# Supplementary material for: The Effect of Angiotensin II, Retinoic Acid, EGCG, and Vitamin C on the Cardiomyogenic Differentiation Induction of Human Amniotic Fluid-Derived Mesenchymal Stem Cells
Source: MDPI journal article supplement (doi:10.3390/ijms21228752), 2020-11-19
Supplement: s1 [file s1]

**Supplementary Table S1.** Primers used in RT-qPCR

| Gene            | Primer Sequence (5'-3')                                           | Product Size (bp) |
|-----------------|-------------------------------------------------------------------|-------------------|
| <i>SOX2</i>     | Forward TGGACAGTTACGCGCACAT<br>Reverse CGAGTAGGACATGCTGTAGGT      | 215               |
| <i>REX1</i>     | Forward GCCTTATGTGATGGCTATGTGT<br>Reverse ACCCCTTATGACGCATTCTATGT | 96                |
| <i>OCT4</i>     | Forward CGAGAAGGATGTGGTCCGAG<br>Reverse CAGAGGAAAGGACACTGGTC      | 136               |
| <i>NANOG</i>    | Forward AGATGCCTCACACGGAGACT<br>Reverse GTTTGCCTTTGGGACTGGTG      | 96                |
| <i>TNNT2</i>    | Forward CATGGAGAAGGACCTGAATGA<br>Reverse CGTCTCTCGATCCTGTCTTTG    | 108               |
| <i>MYH6</i>     | Forward CCACCCAAGTTCGACAAGAT<br>Reverse CACAGAAGAGGCCCGAGTAG      | 127               |
| <i>NKX2-5</i>   | Forward CAAGTGTGCGTCTGCCTTT<br>Reverse GCGCACAGCTCTTTCTTTTC       | 105               |
| <i>DES</i>      | Forward CTGAGCAAAGGGGTTCTGAG<br>Reverse ACTTCATGCTGCTGCTGTGT      | 109               |
| <i>GAPDH</i>    | Forward AGTCCCTGCCCACTCAG<br>Reverse TACTTTATTGATGGTACATGACAAGG   | 123               |
| <i>SCN5A</i>    | Forward TCATCGTAGACGTCTCTCTGGT<br>Reverse GGCTCTTGTTGTTACGATGGT   | 318               |
| <i>CACNA1D</i>  | Forward GGGCAATGGGACCTCATAAATAA<br>Reverse TTACCTGGTTGCGAGTGCATTA | 141               |
| <i>KCNJ12</i>   | Forward GCCAGCTAGGCTCTGTTTGTG<br>Reverse CTGAGACACATCTCTAAGGTAC   | 152               |
| <i>KCND3</i>    | Forward AGAGAGCTGATAAACGCAGGG<br>Reverse CAGGCAGTGCAGCAGGTGAT     | 209               |
| <i>HCN2</i>     | Forward CGCCTGATCCGCTACATCCAT<br>Reverse AGTGCGAAGGAGTACAGTTCCT   | 230               |
| <i>PPARGC1A</i> | Forward GCAATTGAAGAGCGCCGTGTGA<br>Reverse CTGTCTCCATCATCCCGCAGAT  | 134               |
| <i>NRF1</i>     | Forward AGGCTGGGGGAAAGAAAG<br>Reverse CCAACCTGGATAAGTGAGAC        | 303               |
| <i>HIF1A</i>    | Forward CCAACAGTAACCAACCTCAG<br>Reverse TCCTGTGGTGA CTGTGCCTT     | 302               |

**Extracellular Flux analysis**

Extracellular Flux analysis was done using Seahorse XFp Extracellular Flux analyzer, Cell Mito Stress Test Kit and Cell Energy Phenotype Test Kit (Agilent Technologies, USA). The device simultaneously detects changes in oxygen concentration and in proton concentration (or pH) in the assay medium.

Cell Energy Phenotype Test Kit measures the basal oxygen consumption rate (OCR) and then OCR after the injection of the stressor mix (1  $\mu$ M of Oligomycin and 1  $\mu$ M of FCCP). Oligomycin inhibits ATP production by the mitochondria and causes a compensatory increase in the rate of glycolysis as the cells attempt to meet their energy demands via the glycolytic pathway. FCCP depolarizes the mitochondrial membrane and drives OCR higher as the mitochondria attempt to restore the mitochondrial membrane potential. The main parameters are as follows:

- Oxygen consumption rate (OCR): The rate of decrease of oxygen concentration in the assay medium. OCR is a measure of the rate of mitochondrial respiration of the cells.
- Extracellular acidification rate (ECAR): The rate of increase in proton concentration (or decrease in pH) in the assay medium. ECAR is a measure of the rate of glycolysis of the cells.
- Baseline phenotype: OCR and ECAR of cells at starting assay conditions.

- Stressed phenotype: OCR and ECAR of cells in the presence of stressor compounds.
- Metabolic potential: Percentage increase of stressed OCR over baseline OCR and stressed ECAR over baseline ECAR. Metabolic potential is the measure of cells' ability to meet the energy demand via respiration and glycolysis.
